# Supplementary material
Source: Springer Nature journal article supplement (https://www.springermedizin.de/resource/supplementary/12911_2013_829_MOESM3_ESM.pdf/9526742)
Supplement: MOESM3 [file 9526742]

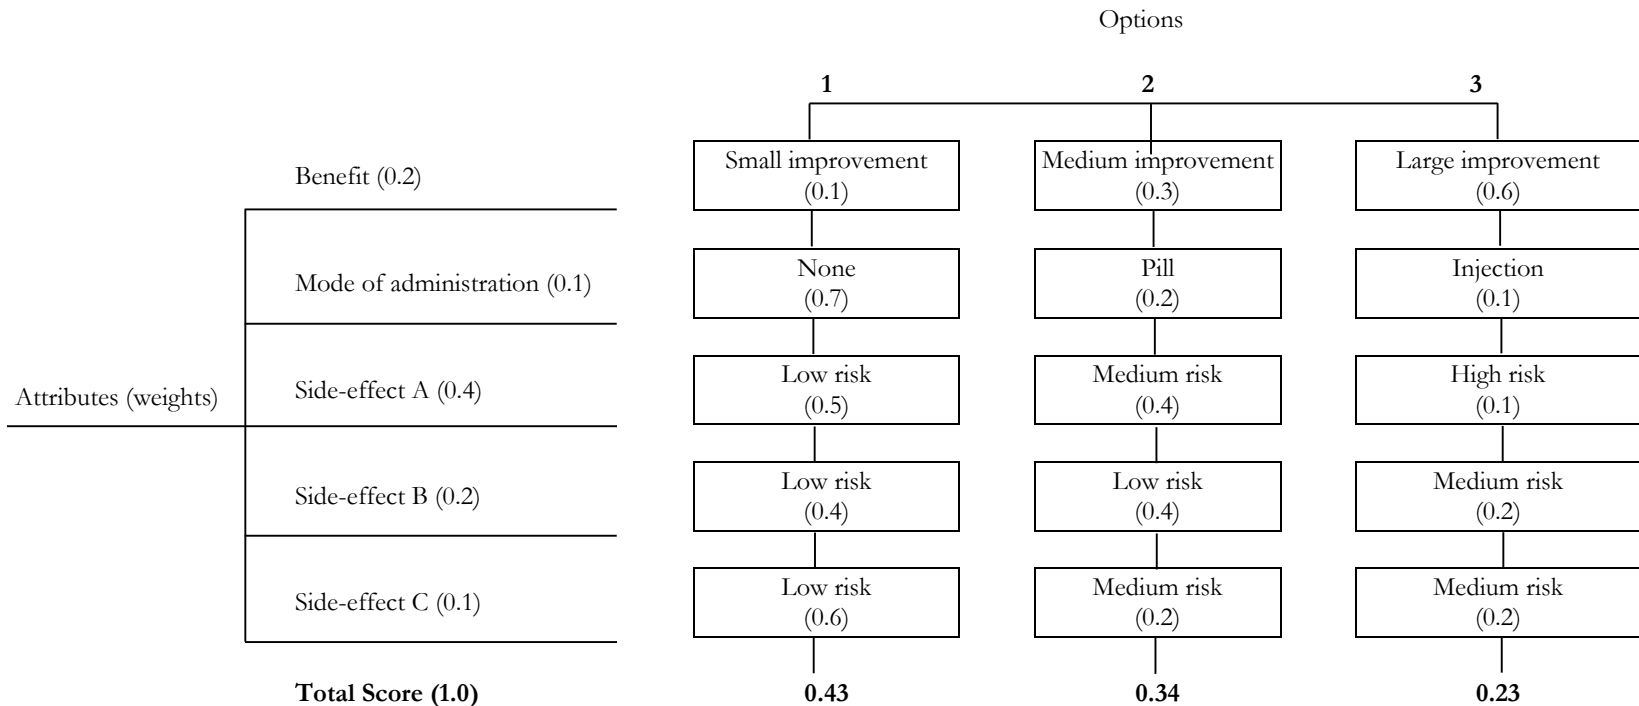

*MCD A: Multi-criteria decision analysis*

*DCIDA: Dynamic Computer Interactive Decision Application*

*This individual rates side-effect A to be the most important (40%) followed by the benefit (20%), side-effect B (20%), and other attributes (where the weights add up to 100%). They score the large improvement in benefit achieved by option 3 highly (0.6) but this only contributes 0.12 (0.6x0.2) to the overall score. The total score is simply the sum of the weighted scores and suggests that option 1 is preferred (43%), followed by option 2 (34%), and finally option 3 (23%).*
